# Supplementary material
Source: publisher figshare collection journal article supplement (https://acs.figshare.com/ndownloader/files/6329247)
Supplement: Supplementary file 1 [file 6329247]

Supplementary Material for

# Near-infrared optical extinction of indium tin oxide structures prepared by nanosphere lithography

*Misun Kang<sup>1</sup>, Mark Losego<sup>2</sup>, Edward Sacht<sup>3</sup>, Jon-Paul Maria<sup>3</sup>, Stefan Franzen<sup>1\*</sup>*

<sup>1</sup>Department of Chemistry, North Carolina State University, Raleigh, NC 27695

<sup>2</sup>School of Materials Science and Engineering, Georgia Institute of Technology, Atlanta, GA 30332

<sup>3</sup>Department of Materials Science and Engineering, North Carolina State University, Raleigh, NC 27695

Figure S1. AFM image of patterned ITO surfaces

Figure S2. SEM image of PMMA spheres for the NLS method

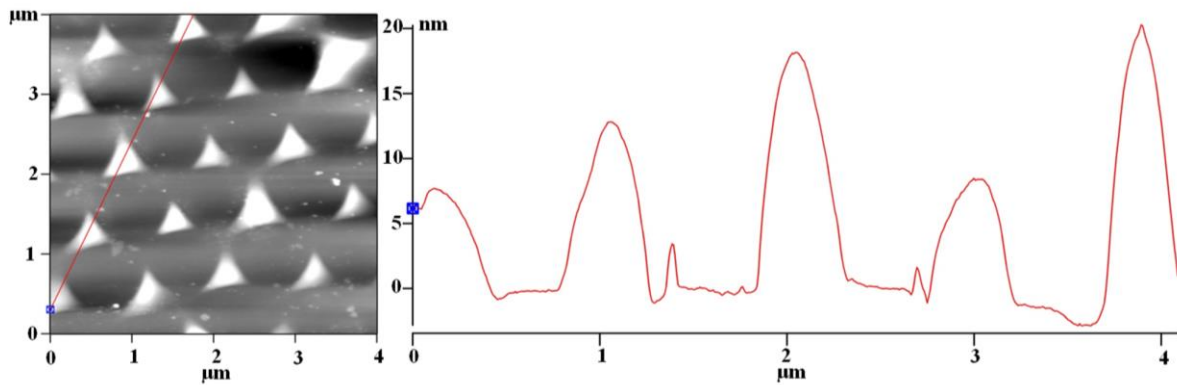

Figure S1. AFM image and height measurement of patterned ITO surfaces made using the nanosphere lithography method.

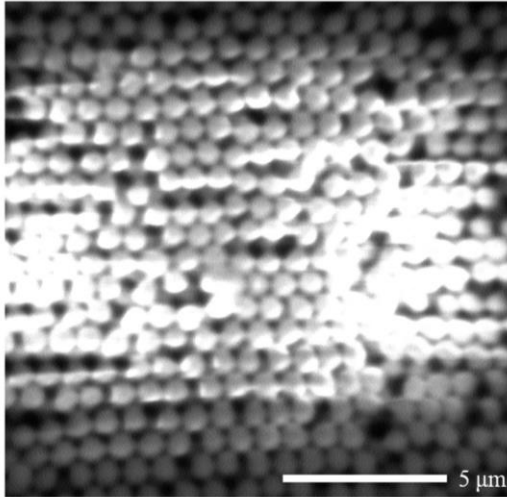

Figure S2. SEM image of PMMA spheres after spin coating. The diameters of the spheres are circa 700 nm to 800 nm. This is approximately 70 to 80 % of the original diameter. Multiple layers with PMMA were used in order to obtain a clear image of PMMA spheres. Since PMMA is not a conductive material, it is difficult to detect one or two layers in the SEM.
